# Supplementary material for: Spatial heterogeneity in biofilm metabolism elicited by local control of phenazine methylation
Source: PubMed Central journal article supplement — bioRxiv. 2023 Feb 16:2023.02.15.528762. Preprint. [Version 1] doi: 10.1101/2023.02.15.528762 (PMC9949047; doi:10.1101/2023.02.15.528762), 2023-02-16
Supplement: media-2.pdf [file media-2.pdf]

**Table S1. Bacterial strains used in this study.**

| Number                                | Strain                                              | Description                                                                                                                            | Source     |
|---------------------------------------|-----------------------------------------------------|----------------------------------------------------------------------------------------------------------------------------------------|------------|
| <i>Pseudomonas aeruginosa</i> strains |                                                     |                                                                                                                                        |            |
| LD0                                   | UCBPP-PA14 (WT)                                     | Clinical isolate UCBPP-PA14                                                                                                            | (1)        |
| LD24                                  | $\Delta phz$ (also referred to as $\Delta phz1/2$ ) | PA14 with the <i>phzA1-G1</i> (PA14_09480-PA14_09410) and <i>phzA2-G2</i> (PA14_39970-PA14_39880) operons deleted                      | (2)        |
| LD3692                                | $\Delta phzH$                                       | PA14 with <i>phzH</i> (PA14_00640) deleted                                                                                             | (3)        |
| LD3739                                | $\Delta phzMS$                                      | PA14 with <i>phzM</i> (PA14_09490) and <i>phzS</i> (PA14_09400) deleted                                                                | (3)        |
| LD3746                                | $\Delta phzHMS$                                     | PA14 with <i>phzH</i> (PA14_00640), <i>phzM</i> (PA14_09490), and <i>phzS</i> (PA14_09400) deleted                                     | (4)        |
| LD64                                  | BigBlue ( <i>phzM+</i> )                            | DKN370; PA14 merodiploid strain containing an extra copy of <i>phzM</i> (PA14_09490)                                                   | (5)        |
| LD3192                                | $\Delta rpoS$                                       | PA14 with <i>rpoS</i> (PA14_17480) deleted                                                                                             | This study |
| LD3193                                | $\Delta rpoS\Delta phz$                             | PA14 with <i>rpoS</i> (PA14_17480) and the <i>phz1</i> (PA14_09480-PA14_09410) and <i>phz2</i> (PA14_39970-PA14_39880) operons deleted | This study |
| LD3469                                | $\Delta rpoS\Delta phzHMS$                          | PA14 with <i>rpoS</i> (PA14_17480), <i>phzH</i> (PA14_00640), <i>phzM</i> (PA14_09490), and <i>phzS</i> (PA14_09400) deleted           | This study |
| LD3674                                | $\Delta crc$                                        | PA14 with <i>crc</i> (PA14_70390) deleted                                                                                              | This study |
| LD3675                                | $\Delta crc\Delta phz$                              | PA14 with <i>crc</i> (PA14_70390) and the <i>phz1</i> (PA14_09480-PA14_09410) and <i>phz2</i> (PA14_39970-PA14_39880) operons deleted  | This study |
| LD3717                                | $\Delta rpoS\Delta crc$                             | PA14 with <i>rpoS</i> (PA14_17480) and <i>crc</i> (PA14_70390) deleted                                                                 | This study |
| LD3190                                | $\Delta rpoN$                                       | PA14 with <i>rpoN</i> (PA14_57940) deleted                                                                                             | This study |
| LD3870                                | PA14 attB::P <i>crc-mScarlet</i>                    | PA14 containing a construct in the <i>attB</i> site that expresses <i>mScarlet</i> under control of the 500bp region upstream of       | This study |

|                        |                                                                                    |                                                                                                                                                                                                                                                                                                      |            |
|------------------------|------------------------------------------------------------------------------------|------------------------------------------------------------------------------------------------------------------------------------------------------------------------------------------------------------------------------------------------------------------------------------------------------|------------|
|                        |                                                                                    | <i>crc</i> (PA14_17480)                                                                                                                                                                                                                                                                              |            |
| LD4082                 | PA14<br>attB::P <i>crcZ-mScarlet</i>                                               | PA14 containing a construct in the <i>attB</i> site that expresses <i>mScarlet</i> under control of the 350bp region upstream of <i>crcZ</i> (Unannotated between PA14_62540 and PA14_62560. Annotated as PA4726.11 in PAO1)                                                                         | This study |
| LD3941                 | $\Delta$ <i>rpoS</i><br>attB::P <i>crc-mScarlet</i>                                | $\Delta$ <i>rpoS</i> (PA14_17480) containing a construct in the <i>attB</i> site that expresses <i>mScarlet</i> under control of the 500bp region upstream of <i>crc</i> (PA14_17480)                                                                                                                | This study |
| LD4108                 | $\Delta$ <i>rpoS</i><br>attB::P <i>crcZ-mScarlet</i>                               | $\Delta$ <i>rpoS</i> (PA14_17480) containing a construct in the <i>attB</i> site that expresses <i>mScarlet</i> under control of the 350bp region upstream of <i>crcZ</i> (Annotated as PA4726.11 in PAO1)                                                                                           | This study |
| LD4498                 | $\Delta$ <i>cbrB</i><br>attB::P <i>crcZ-mScarlet</i>                               | PA14 attB::P <i>crcZ-mScarlet</i> , with <i>cbrB</i> (PA14_62540) deleted                                                                                                                                                                                                                            | This study |
| LD4501                 | $\Delta$ <i>rpoS<math>\Delta</math><i>cbrB</i><br/>attB::P<i>crcZ-mScarlet</i></i> | PA14 attB::P <i>crcZ-mScarlet</i> , with <i>cbrB</i> (PA14_62540) and <i>rpoS</i> (PA14_17480) deleted                                                                                                                                                                                               | This study |
| LD4499                 | PA14<br>attB::PTL <i>phzM-mScarlet</i>                                             | PA14 containing a construct in the <i>attB</i> site in which the 695 bp upstream region and first 6 codons of <i>phzM</i> (PA14_09490) are fused to <i>mScarlet</i>                                                                                                                                  | This study |
| LD4502                 | $\Delta$ <i>rpoS</i><br>attB::PTL <i>phzM-mScarlet</i>                             | $\Delta$ <i>rpoS</i> (PA14_17480) containing a construct in the <i>attB</i> site in which the 695 bp upstream region and first 6 codons of <i>phzM</i> (PA14_09490) are fused to <i>mScarlet</i>                                                                                                     | This study |
| LD4582                 | $\Delta$ <i>crc</i><br>attB::PTL <i>phzM-mScarlet</i>                              | $\Delta$ <i>crc</i> (PA14_17480) a construct in the <i>attB</i> site in which the 695 bp upstream region and first 6 codons of <i>phzM</i> (PA14_09490) are fused to <i>mScarlet</i>                                                                                                                 | This study |
| <i>E. coli</i> strains |                                                                                    |                                                                                                                                                                                                                                                                                                      |            |
| LD44                   | UQ950                                                                              | <i>E. coli</i> DH5 $\alpha$ $\lambda$ (pir) host for cloning;<br>F- $\Delta$ ( <i>argF-lac</i> )169 $\Phi$ 80 <i>dlacZ58</i> ( $\Delta$ M15)<br><i>glnV44</i> (AS) <i>rfbD1</i> <i>gyrA96</i> (NalR) <i>recA1</i><br><i>endA1</i> <i>spoT1</i> <i>thi-1</i> <i>hsdR17</i> <i>deoR</i> $\lambda$ pir+ | D. Lies    |
| LD661                  | BW29427                                                                            | Donor strain for conjugation: <i>thrB1004 pro</i>                                                                                                                                                                                                                                                    | W. Metcalf |

|                                         |        |                                                                                                                                     |            |
|-----------------------------------------|--------|-------------------------------------------------------------------------------------------------------------------------------------|------------|
|                                         |        | <i>thi rpsL hsdS lacZ</i> ΔM15RP4–1360<br>Δ( <i>araBAD</i> )567 Δ <i>dapA</i> 1341::[ <i>erm pir</i> (wt)]                          |            |
| LD2901                                  | S17-1  | Donor strain for conjugation: Str <sup>R</sup> , Tp <sup>R</sup> , F-<br>RP4-2-Tc::Mu <i>aphA</i> ::Tn7 <i>recA</i> λpir<br>lysogen | R. Simon   |
| <i>Saccharomyces cerevisiae</i> strains |        |                                                                                                                                     |            |
| LD676                                   | InvSc1 | <i>MATα/MATα leu2/leu2 trp1-289/trp1-289</i><br><i>ura3-52/ura3-52 his3-Δ1/his3-Δ1</i>                                              | Invitrogen |

**Table S2. Plasmids used in this study.**

| Plasmid Name | Description                                                                                                                                                                                                   | Source     |
|--------------|---------------------------------------------------------------------------------------------------------------------------------------------------------------------------------------------------------------|------------|
| pMQ30        | Yeast-based allelic-exchange vector; <i>sacB</i> <sup>+</sup> , CEN/ARSH, URA3 <sup>+</sup> , Gm <sup>R</sup> .                                                                                               | (6)        |
| pFLP2        | Site-specific excision vector with cl857-controlled FLP recombinase. encoding sequence, <i>sacB</i> <sup>+</sup> , Amp <sup>R</sup> . Used to insert LD3208-based plasmids into <i>P. aeruginosa</i> strains. | (7)        |
| pLD3208      | Gm <sup>R</sup> , Tet <sup>R</sup> flanked by Flp recombinase target (FRT) sites to resolve out resistance cassettes.                                                                                         | (8)        |
| pLD3471      | Δ <i>rpoS</i> ( <i>PA14_17480</i> ) PCR fragment introduced into pMQ30 by gap repair cloning in yeast strain InvSc1.                                                                                          | This study |
| pLD3473      | Δ <i>rpoN</i> ( <i>PA14_57940</i> ) PCR fragment introduced into pMQ30 by gap repair cloning in yeast strain InvSc1.                                                                                          | This study |
| pLD3673      | Δ <i>crc</i> ( <i>PA14_70390</i> ) PCR fragment introduced into pMQ30 by gap repair cloning in yeast strain InvSc1.                                                                                           | This study |
| pLD3869      | 500 bp upstream of <i>crc</i> ( <i>PA14_70390</i> ) PCR fragment ligated into pLD3208 using <i>SpeI</i> and <i>XhoI</i> .                                                                                     | This study |
| pLD4645      | 350 bp upstream of <i>crcZ</i> (annotated as <i>PA4726.11</i> in PAO1) PCR fragment ligated into pLD3208 using <i>SpeI</i> and <i>XhoI</i> .                                                                  | This study |
| pLD4179      | 695 bp upstream and first six codons of <i>phzM</i> ( <i>PA14_09490</i> ) PCR fragment ligated into pLD3208 using <i>EcoRI</i> and <i>SphI</i> .                                                              | This study |

**Table S3. Primers used in this study.**

| Primer Number                                                       | Sequence                                                      |
|---------------------------------------------------------------------|---------------------------------------------------------------|
| Primers for plasmid pLD3471 (used to make $\Delta rpoS$ )           |                                                               |
| LD2560                                                              | ggaattgtgagcggataacaatttcacacaggaaacagct TGGATAAGGGGGAAGGATTG |
| LD2561                                                              | CCGTTCTTCTCCAGGATCTC CGGCCCTTCTTTTTTGAGTGC                    |
| LD2562                                                              | GCACTCAAAAAAGAAGGGCCG GAGATCCTGGAGAAGAACGG                    |
| LD2563                                                              | aggcaaattctgtttatcagaccgcttctgcttctgat AAACCACCAGCCTGCCGCAC   |
| Primers for plasmid pLD3473 (used to make $\Delta rpoN$ )           |                                                               |
| LD2568                                                              | ggaattgtgagcggataacaatttcacacaggaaacagct CGCGCCCGCGCATCGACATG |
| LD2569                                                              | CACCAGTCGCTTGCGCTC CATCTTGAGGACTAGCGATGG                      |
| LD2570                                                              | CCATCGCTAGTCCTCAAGATG GAGCGCAAGCGACTGGTG                      |
| LD2571                                                              | aggcaaattctgtttatcagaccgcttctgcttctgat CAGGGCGCGCTGCGCCAGGT   |
| Primers for plasmid pLD3673 (used to make $\Delta crc$ )            |                                                               |
| LD3184                                                              | ggaattgtgagcggataacaatttcacacaggaaacagct GCCCTTGTCGTTGACGTAGC |
| LD3185                                                              | TCGACGATCAGCGGCGCATGC CCGCAGCCTGAATACCATTAC                   |
| LD3186                                                              | GTGAATGGTATTCAGGCTGCG GCATGCGCCGCTGATCGTCA                    |
| LD3197                                                              | aggcaaattctgtttatcagaccgcttctgcttctgatTCGGCGAGAACACCCTGTAC    |
| Primers for plasmid pLD3869 (used to make <i>Pcrc-mScarlet</i> )    |                                                               |
| LD3273                                                              | tcccgacgggcccgtaccaGATGATCTGCATCACTTCG                        |
| LD3274                                                              | tcttaaacttagactcgaggAAATGGCCCCCAAATCAC                        |
| Primers for plasmid pLD4645 (used to make <i>PcrcZ-mScarlet</i> )   |                                                               |
| LD3663                                                              | acgtacactagtCACCTGCAACCTGTTACC                                |
| LD3272                                                              | tcttaaacttagactcgaggCAATACATAAGCAGATGCCGTGCC                  |
| Primers for plasmid pLD4179 (used to make <i>PTLphzM-mScarlet</i> ) |                                                               |
| LD3975                                                              | acgtacgtacGAATTCGCGCCGCCTCCGAGA                               |
| LD3660                                                              | ctccttactaagattcgaattattcatctttattc                           |

|        |                                       |
|--------|---------------------------------------|
| LD3751 | ttcgaatcttagtaaaggagaagctgtg          |
| LD3976 | acgtacgtacGCATGCccagtcaggagctcataaaac |

### Supplementary references

1. L. G. Rahme, *et al.*, Common virulence factors for bacterial pathogenicity in plants and animals. *Science* **268**, 1899–1902 (1995).
2. L. E. P. Dietrich, A. Price-Whelan, A. Petersen, M. Whiteley, D. K. Newman, The phenazine pyocyanin is a terminal signalling factor in the quorum sensing network of *Pseudomonas aeruginosa*. *Mol. Microbiol.* **61**, 1308–1321 (2006).
3. D. L. Bellin, *et al.*, Integrated circuit-based electrochemical sensor for spatially resolved detection of redox-active metabolites in biofilms. *Nat. Commun.* **5**, 3256 (2014).
4. D. A. Recinos, *et al.*, Redundant phenazine operons in *Pseudomonas aeruginosa* exhibit environment-dependent expression and differential roles in pathogenicity. *Proc. Natl. Acad. Sci. U. S. A.* **109**, 19420–19425 (2012).
5. A. Price-Whelan, L. E. P. Dietrich, D. K. Newman, Pyocyanin alters redox homeostasis and carbon flux through central metabolic pathways in *Pseudomonas aeruginosa* PA14. *J. Bacteriol.* **189**, 6372–6381 (2007).
6. R. M. Q. Shanks, N. C. Caiazza, S. M. Hinsa, C. M. Toutain, G. A. O’Toole, *Saccharomyces cerevisiae*-based molecular tool kit for manipulation of genes from gram-negative bacteria. *Appl. Environ. Microbiol.* **72**, 5027–5036 (2006).
7. T. T. Hoang, R. R. Karkhoff-Schweizer, A. J. Kutchma, H. P. Schweizer, A broad-host-range Flp-FRT recombination system for site-specific excision of chromosomally-located DNA sequences: application for isolation of unmarked *Pseudomonas aeruginosa* mutants. *Gene* **212**, 77–86 (1998).
8. B. Wang, *et al.*, *Pseudomonas aeruginosa* PA14 produces R-bodies, extendable protein polymers with roles in host colonization and virulence. *Nat. Commun.* **12**, 4613 (2021).
